# Supplementary material
Source: publisher figshare collection journal article supplement (https://acs.figshare.com/ndownloader/files/5163256)
Supplement: Supplementary file 1 [file 5163256]

 
data_complex 6 
 
_audit_creation_method            SHELXL-97 
_chemical_name_systematic 
; 
 ? 
; 
_chemical_name_common             ? 
_chemical_melting_point           ? 
_chemical_formula_moiety          ? 
_chemical_formula_sum 
 'C28 H60 N4 O4 S8 Zn4' 
_chemical_formula_weight          1034.76 
 
loop_ 
 _atom_type_symbol 
 _atom_type_description 
 _atom_type_scat_dispersion_real 
 _atom_type_scat_dispersion_imag 
 _atom_type_scat_source 
 'C'  'C'   0.0033   0.0016 
 'International Tables Vol C Tables 4.2.6.8 and 6.1.1.4' 
 'H'  'H'   0.0000   0.0000 
 'International Tables Vol C Tables 4.2.6.8 and 6.1.1.4' 
 'N'  'N'   0.0061   0.0033 
 'International Tables Vol C Tables 4.2.6.8 and 6.1.1.4' 
 'O'  'O'   0.0106   0.0060 
 'International Tables Vol C Tables 4.2.6.8 and 6.1.1.4' 
 'S'  'S'   0.1246   0.1234 
 'International Tables Vol C Tables 4.2.6.8 and 6.1.1.4' 
 'Zn'  'Zn'   0.2839   1.4301 
 'International Tables Vol C Tables 4.2.6.8 and 6.1.1.4' 
 
_symmetry_cell_setting            'monoclinic' 
_symmetry_space_group_name_H-M    'P21/c'
 
loop_ 
 _symmetry_equiv_pos_as_xyz 
 'x, y, z' 
 '-x, y+1/2, -z+1/2' 
 '-x, -y, -z' 
 'x, -y-1/2, z-1/2' 
 
_cell_length_a                    14.594(1) 
_cell_length_b                    12.531(1) 
_cell_length_c                    23.022(1) 
_cell_angle_alpha                 90.00 
_cell_angle_beta                  104.31(1) 
_cell_angle_gamma                 90.00 
_cell_volume                      4079.6(5) 
_cell_formula_units_Z             4 
_cell_measurement_temperature     198(2) 
_cell_measurement_reflns_used     ? 
_cell_measurement_theta_min       ? 
_cell_measurement_theta_max       ? 
 
_exptl_crystal_description        'block' 
_exptl_crystal_colour             'colourless' 
_exptl_crystal_size_max           0.30 
_exptl_crystal_size_mid           0.25 
_exptl_crystal_size_min           0.15 
_exptl_crystal_density_meas       ? 
_exptl_crystal_density_diffrn     1.685 
_exptl_crystal_density_method     'not measured' 
_exptl_crystal_F_000              2144 
_exptl_absorpt_coefficient_mu     2.771 
_exptl_absorpt_correction_type    'SORTAV (Blessing, 1995 & 1997)' 
_exptl_absorpt_correction_T_min   0.4902 
_exptl_absorpt_correction_T_max   0.6813 
_exptl_absorpt_process_details    ? 
 
_exptl_special_details 
; 
 ? 
; 
 
_diffrn_ambient_temperature       198(2) 
_diffrn_radiation_wavelength      0.71073 
_diffrn_radiation_type            MoK\a 
_diffrn_radiation_source          'rotating anode Nonius FR591' 
_diffrn_radiation_monochromator   graphite 
_diffrn_measurement_device_type   'Nonius KappaCCD' 
_diffrn_measurement_method        '\w and \f scans' 
_diffrn_detector_area_resol_mean  ? 
_diffrn_standards_number          ? 
_diffrn_standards_interval_count  ? 
_diffrn_standards_interval_time   ? 
_diffrn_standards_decay_%         ? 
_diffrn_reflns_number             27655 
_diffrn_reflns_av_R_equivalents   0.0452 
_diffrn_reflns_av_sigmaI/netI     0.0401 
_diffrn_reflns_limit_h_min        -19 
_diffrn_reflns_limit_h_max        19 
_diffrn_reflns_limit_k_min        -16 
_diffrn_reflns_limit_k_max        16 
_diffrn_reflns_limit_l_min        -30 
_diffrn_reflns_limit_l_max        30 
_diffrn_reflns_theta_min          3.01 
_diffrn_reflns_theta_max          28.28 
_reflns_number_total              10028 
_reflns_number_gt                 8583 
_reflns_threshold_expression      >2sigma(I) 
 
_computing_data_collection        'Collect (Nonius B.V., 1998)' 
_computing_cell_refinement        'Collect (Nonius B.V., 1998)' 
_computing_data_reduction         'Denzo-SMN (Otwinowski & Minor, 1997)'
_computing_structure_solution     'SHELXS-97 (Sheldrick, 1990)' 
_computing_structure_refinement   'SHELXL-97 (Sheldrick, 1997)' 
_computing_molecular_graphics     'SCHAKAL (Keller, 1997)' 
_computing_publication_material   'SHELXL-97 (Shedlrick, 1997)' 
 
_refine_special_details 
; 
 Refinement of F^2^ against ALL reflections.  The weighted R-factor wR and 
 goodness of fit S are based on F^2^, conventional R-factors R are based 
 on F, with F set to zero for negative F^2^. The threshold expression of 
 F^2^ > 2sigma(F^2^) is used only for calculating R-factors(gt) etc. and is 
 not relevant to the choice of reflections for refinement.  R-factors based 
 on F^2^ are statistically about twice as large as those based on F, and R- 
 factors based on ALL data will be even larger. 
; 
 
_refine_ls_structure_factor_coef  Fsqd  
_refine_ls_matrix_type            full 
_refine_ls_weighting_scheme       calc  
_refine_ls_weighting_details 
 'calc w=1/[\s^2^(Fo^2^)+(0.0224P)^2^+3.8230P] where P=(Fo^2^+2Fc^2^)/3' 
_atom_sites_solution_primary      direct 
_atom_sites_solution_secondary    difmap 
_atom_sites_solution_hydrogens    geom 
_refine_ls_hydrogen_treatment     'refined as riding atoms'
_refine_ls_extinction_method      none 
_refine_ls_extinction_coef        ? 
_refine_ls_number_reflns          10028 
_refine_ls_number_parameters      437 
_refine_ls_number_restraints      0 
_refine_ls_R_factor_all           0.0387 
_refine_ls_R_factor_gt            0.0299 
_refine_ls_wR_factor_ref          0.0716 
_refine_ls_wR_factor_gt           0.0680 
_refine_ls_goodness_of_fit_ref    1.032 
_refine_ls_restrained_S_all       1.032 
_refine_ls_shift/su_max           0.002 
_refine_ls_shift/su_mean          0.000 
 
loop_ 
 _atom_site_label 
 _atom_site_type_symbol 
 _atom_site_fract_x 
 _atom_site_fract_y 
 _atom_site_fract_z 
 _atom_site_U_iso_or_equiv 
 _atom_site_adp_type 
 _atom_site_occupancy 
 _atom_site_symmetry_multiplicity 
 _atom_site_calc_flag 
 _atom_site_refinement_flags 
 _atom_site_disorder_assembly 
 _atom_site_disorder_group 
Zn1 Zn 0.088142(17) 0.562355(19) 0.201334(11) 0.01858(6) Uani 1 1 d . . . 
Zn2 Zn 0.283445(17) 0.435232(19) 0.152731(11) 0.01905(6) Uani 1 1 d . . . 
Zn3 Zn 0.342932(18) 0.356144(19) 0.314883(11) 0.02007(6) Uani 1 1 d . . . 
Zn4 Zn 0.275808(17) 0.637412(19) 0.335880(11) 0.01906(6) Uani 1 1 d . . . 
S1 S 0.21789(4) 0.60424(4) 0.16310(3) 0.02213(11) Uani 1 1 d . . . 
S2 S -0.02935(4) 0.47111(5) 0.13718(3) 0.03014(13) Uani 1 1 d . . . 
S3 S 0.23649(4) 0.32493(4) 0.22143(2) 0.01940(10) Uani 1 1 d . . . 
S4 S 0.42593(4) 0.40482(5) 0.13316(3) 0.02704(12) Uani 1 1 d . . . 
S5 S 0.39903(4) 0.53264(4) 0.31628(2) 0.02122(11) Uani 1 1 d . . . 
S6 S 0.33142(5) 0.28999(5) 0.40507(3) 0.03543(15) Uani 1 1 d . . . 
S7 S 0.13397(4) 0.54259(4) 0.30610(2) 0.02074(11) Uani 1 1 d . . . 
S8 S 0.26086(4) 0.81837(4) 0.32853(3) 0.02578(12) Uani 1 1 d . . . 
N1 N -0.00854(12) 0.68393(14) 0.21113(8) 0.0178(3) Uani 1 1 d . . . 
N2 N 0.21517(13) 0.43757(16) 0.05840(8) 0.0253(4) Uani 1 1 d . . . 
N3 N 0.42232(12) 0.22019(14) 0.29950(8) 0.0195(4) Uani 1 1 d . . . 
N4 N 0.35398(13) 0.65243(14) 0.42815(8) 0.0213(4) Uani 1 1 d . . . 
C11 C -0.12438(15) 0.56241(18) 0.14280(10) 0.0244(5) Uani 1 1 d . . . 
H11A H -0.1370 0.6118 0.1082 0.029 Uiso 1 1 calc R . . 
H11B H -0.1827 0.5208 0.1409 0.029 Uiso 1 1 calc R . . 
C12 C -0.10068(15) 0.62694(17) 0.20031(10) 0.0220(4) Uani 1 1 d . . . 
H12A H -0.1515 0.6799 0.1989 0.026 Uiso 1 1 calc R . . 
H12B H -0.0994 0.5785 0.2345 0.026 Uiso 1 1 calc R . . 
C13 C 0.01829(15) 0.72512(17) 0.27357(10) 0.0221(4) Uani 1 1 d . . . 
H13A H -0.0355 0.7660 0.2814 0.027 Uiso 1 1 calc R . . 
H13B H 0.0722 0.7749 0.2776 0.027 Uiso 1 1 calc R . . 
C14 C 0.04562(16) 0.63783(19) 0.32055(10) 0.0240(5) Uani 1 1 d . . . 
H14A H -0.0120 0.5979 0.3226 0.029 Uiso 1 1 calc R . . 
H14B H 0.0711 0.6715 0.3601 0.029 Uiso 1 1 calc R . . 
C15 C -0.01637(15) 0.77209(17) 0.16659(10) 0.0237(5) Uani 1 1 d . . . 
H15A H -0.0741 0.8139 0.1661 0.028 Uiso 1 1 calc R . . 
H15B H -0.0241 0.7405 0.1263 0.028 Uiso 1 1 calc R . . 
C16 C 0.06798(16) 0.84756(17) 0.17875(11) 0.0247(5) Uani 1 1 d . . . 
H16A H 0.0642 0.8967 0.2117 0.030 Uiso 1 1 calc R . . 
H16B H 0.1271 0.8058 0.1917 0.030 Uiso 1 1 calc R . . 
C17 C 0.07083(18) 0.91213(18) 0.12328(11) 0.0284(5) Uani 1 1 d . . . 
H17A H 0.0884 0.8646 0.0934 0.034 Uiso 1 1 calc R . . 
H17B H 0.0070 0.9409 0.1052 0.034 Uiso 1 1 calc R . . 
O1 O 0.13662(12) 0.99822(13) 0.13661(8) 0.0308(4) Uani 1 1 d . . . 
H1 H 0.1834 0.9798 0.1641 0.046 Uiso 1 1 calc R . . 
C21 C 0.38470(18) 0.4171(2) 0.05213(11) 0.0364(6) Uani 1 1 d . . . 
H21A H 0.3915 0.4923 0.0407 0.044 Uiso 1 1 calc R . . 
H21B H 0.4252 0.3728 0.0330 0.044 Uiso 1 1 calc R . . 
C22 C 0.28176(18) 0.3830(2) 0.02823(11) 0.0364(6) Uani 1 1 d . . . 
H22A H 0.2621 0.3982 -0.0153 0.044 Uiso 1 1 calc R . . 
H22B H 0.2771 0.3049 0.0335 0.044 Uiso 1 1 calc R . . 
C23 C 0.21005(19) 0.5530(2) 0.04368(11) 0.0325(6) Uani 1 1 d . . . 
H23A H 0.1756 0.5621 0.0012 0.039 Uiso 1 1 calc R . . 
H23B H 0.2750 0.5806 0.0483 0.039 Uiso 1 1 calc R . . 
C24 C 0.16119(18) 0.61931(19) 0.08268(11) 0.0296(5) Uani 1 1 d . . . 
H24A H 0.0942 0.5972 0.0750 0.036 Uiso 1 1 calc R . . 
H24B H 0.1626 0.6954 0.0714 0.036 Uiso 1 1 calc R . . 
C25 C 0.11945(17) 0.3882(2) 0.03766(11) 0.0297(5) Uani 1 1 d . . . 
H25A H 0.1048 0.3794 -0.0064 0.036 Uiso 1 1 calc R . . 
H25B H 0.0720 0.4376 0.0468 0.036 Uiso 1 1 calc R . . 
C26 C 0.11003(19) 0.2797(2) 0.06624(13) 0.0377(6) Uani 1 1 d . . . 
H26A H 0.1639 0.2342 0.0629 0.045 Uiso 1 1 calc R . . 
H26B H 0.1141 0.2904 0.1094 0.045 Uiso 1 1 calc R . . 
C27 C 0.01899(19) 0.2219(2) 0.03820(13) 0.0386(6) Uani 1 1 d . . . 
H27A H 0.0173 0.2075 -0.0043 0.046 Uiso 1 1 calc R . . 
H27B H 0.0200 0.1520 0.0585 0.046 Uiso 1 1 calc R . . 
O2 O -0.06524(15) 0.27532(17) 0.04043(10) 0.0483(5) Uani 1 1 d . . . 
H2 H -0.0535 0.3209 0.0681 0.072 Uiso 1 1 calc R . . 
C31 C 0.39890(19) 0.1691(2) 0.40042(11) 0.0319(5) Uani 1 1 d . . . 
H31A H 0.4659 0.1815 0.4214 0.038 Uiso 1 1 calc R . . 
H31B H 0.3748 0.1106 0.4215 0.038 Uiso 1 1 calc R . . 
C32 C 0.39381(17) 0.13424(18) 0.33639(10) 0.0254(5) Uani 1 1 d . . . 
H32A H 0.4356 0.0717 0.3373 0.031 Uiso 1 1 calc R . . 
H32B H 0.3283 0.1117 0.3172 0.031 Uiso 1 1 calc R . . 
C33 C 0.39427(15) 0.18931(18) 0.23531(10) 0.0220(4) Uani 1 1 d . . . 
H33A H 0.4159 0.1155 0.2311 0.026 Uiso 1 1 calc R . . 
H33B H 0.4264 0.2369 0.2123 0.026 Uiso 1 1 calc R . . 
C34 C 0.28795(16) 0.19543(17) 0.20880(10) 0.0231(4) Uani 1 1 d . . . 
H34A H 0.2568 0.1383 0.2267 0.028 Uiso 1 1 calc R . . 
H34B H 0.2746 0.1821 0.1651 0.028 Uiso 1 1 calc R . . 
C35 C 0.52645(16) 0.23724(19) 0.31991(11) 0.0274(5) Uani 1 1 d . . . 
H35A H 0.5589 0.1684 0.3179 0.033 Uiso 1 1 calc R . . 
H35B H 0.5421 0.2603 0.3624 0.033 Uiso 1 1 calc R . . 
C36 C 0.56418(15) 0.31946(19) 0.28336(11) 0.0258(5) Uani 1 1 d . . . 
H36A H 0.5170 0.3770 0.2708 0.031 Uiso 1 1 calc R . . 
H36B H 0.5751 0.2855 0.2468 0.031 Uiso 1 1 calc R . . 
C37 C 0.65629(16) 0.36659(19) 0.32022(11) 0.0281(5) Uani 1 1 d . . . 
H37A H 0.6438 0.4055 0.3549 0.034 Uiso 1 1 calc R . . 
H37B H 0.7010 0.3080 0.3359 0.034 Uiso 1 1 calc R . . 
O3 O 0.69879(12) 0.43791(13) 0.28590(8) 0.0312(4) Uani 1 1 d . . . 
H3 H 0.7036 0.4074 0.2543 0.047 Uiso 1 1 calc R . . 
C41 C 0.33871(17) 0.84791(18) 0.40194(11) 0.0274(5) Uani 1 1 d . . . 
H41A H 0.4045 0.8549 0.3980 0.033 Uiso 1 1 calc R . . 
H41B H 0.3200 0.9170 0.4164 0.033 Uiso 1 1 calc R . . 
C42 C 0.33482(19) 0.76123(18) 0.44786(11) 0.0294(5) Uani 1 1 d . . . 
H42A H 0.3818 0.7780 0.4858 0.035 Uiso 1 1 calc R . . 
H42B H 0.2714 0.7620 0.4561 0.035 Uiso 1 1 calc R . . 
C43 C 0.45470(16) 0.64436(18) 0.42488(11) 0.0256(5) Uani 1 1 d . . . 
H43A H 0.4959 0.6452 0.4661 0.031 Uiso 1 1 calc R . . 
H43B H 0.4705 0.7078 0.4036 0.031 Uiso 1 1 calc R . . 
C44 C 0.47582(16) 0.54435(19) 0.39305(11) 0.0266(5) Uani 1 1 d . . . 
H44A H 0.4668 0.4808 0.4166 0.032 Uiso 1 1 calc R . . 
H44B H 0.5428 0.5458 0.3910 0.032 Uiso 1 1 calc R . . 
C45 C 0.33418(17) 0.57055(19) 0.47070(11) 0.0282(5) Uani 1 1 d . . . 
H45A H 0.3742 0.5859 0.5113 0.034 Uiso 1 1 calc R . . 
H45B H 0.3528 0.4996 0.4586 0.034 Uiso 1 1 calc R . . 
C46 C 0.23130(19) 0.5655(2) 0.47397(12) 0.0385(6) Uani 1 1 d . . . 
H46A H 0.2181 0.6267 0.4979 0.046 Uiso 1 1 calc R . . 
H46B H 0.1900 0.5725 0.4330 0.046 Uiso 1 1 calc R . . 
C47 C 0.2068(2) 0.4635(2) 0.50147(13) 0.0439(7) Uani 1 1 d . . . 
H47A H 0.1385 0.4641 0.5002 0.053 Uiso 1 1 calc R . . 
H47B H 0.2185 0.4025 0.4770 0.053 Uiso 1 1 calc R . . 
O4 O 0.25797(16) 0.4482(2) 0.56049(10) 0.0536(6) Uani 1 1 d . . . 
H4 H 0.2262 0.4702 0.5839 0.080 Uiso 1 1 calc R . . 
 
loop_ 
 _atom_site_aniso_label 
 _atom_site_aniso_U_11 
 _atom_site_aniso_U_22 
 _atom_site_aniso_U_33 
 _atom_site_aniso_U_23 
 _atom_site_aniso_U_13 
 _atom_site_aniso_U_12 
Zn1 0.01534(12) 0.01929(12) 0.02150(12) -0.00100(9) 0.00528(9) 0.00113(9) 
Zn2 0.01679(12) 0.02131(13) 0.01918(12) 0.00084(9) 0.00470(9) 0.00077(9) 
Zn3 0.01996(13) 0.01833(12) 0.02251(13) -0.00102(9) 0.00637(10) 0.00013(9) 
Zn4 0.01538(12) 0.02007(13) 0.02075(12) -0.00025(9) 0.00259(9) 0.00005(9) 
S1 0.0188(2) 0.0197(3) 0.0298(3) -0.0012(2) 0.0095(2) -0.0003(2) 
S2 0.0238(3) 0.0292(3) 0.0370(3) -0.0144(2) 0.0065(2) -0.0036(2) 
S3 0.0146(2) 0.0207(3) 0.0231(3) 0.00156(19) 0.00490(19) 0.00055(19) 
S4 0.0164(3) 0.0397(3) 0.0255(3) 0.0011(2) 0.0060(2) 0.0020(2) 
S5 0.0199(3) 0.0188(2) 0.0261(3) -0.0018(2) 0.0078(2) 0.0003(2) 
S6 0.0546(4) 0.0286(3) 0.0291(3) 0.0009(2) 0.0217(3) -0.0002(3) 
S7 0.0172(2) 0.0216(3) 0.0218(3) 0.00166(19) 0.00187(19) -0.00191(19) 
S8 0.0235(3) 0.0207(3) 0.0308(3) 0.0021(2) 0.0022(2) 0.0016(2) 
N1 0.0129(8) 0.0180(8) 0.0214(9) -0.0015(7) 0.0019(7) -0.0008(7) 
N2 0.0203(9) 0.0363(11) 0.0189(9) 0.0001(8) 0.0043(7) 0.0074(8) 
N3 0.0164(8) 0.0196(9) 0.0225(9) 0.0007(7) 0.0048(7) 0.0008(7) 
N4 0.0196(9) 0.0211(9) 0.0217(9) -0.0011(7) 0.0020(7) 0.0020(7) 
C11 0.0169(10) 0.0247(11) 0.0296(12) -0.0024(9) 0.0022(9) -0.0027(8) 
C12 0.0123(9) 0.0238(11) 0.0304(12) -0.0023(9) 0.0064(8) -0.0018(8) 
C13 0.0164(10) 0.0244(11) 0.0259(11) -0.0082(9) 0.0058(8) 0.0008(8) 
C14 0.0182(10) 0.0332(12) 0.0219(11) -0.0036(9) 0.0075(8) -0.0006(9) 
C15 0.0184(10) 0.0197(11) 0.0298(12) 0.0017(9) -0.0001(9) 0.0012(8) 
C16 0.0213(11) 0.0191(11) 0.0325(12) 0.0002(9) 0.0042(9) -0.0006(8) 
C17 0.0307(13) 0.0229(11) 0.0296(12) 0.0015(9) 0.0036(10) -0.0022(10) 
O1 0.0268(9) 0.0265(9) 0.0380(10) 0.0067(7) 0.0059(7) -0.0025(7) 
C21 0.0256(12) 0.0619(18) 0.0249(12) 0.0060(11) 0.0122(10) 0.0129(12) 
C22 0.0249(12) 0.0621(18) 0.0214(12) -0.0074(11) 0.0041(10) 0.0161(12) 
C23 0.0305(13) 0.0440(15) 0.0256(12) 0.0111(10) 0.0119(10) 0.0092(11) 
C24 0.0315(13) 0.0277(12) 0.0314(13) 0.0104(10) 0.0108(10) 0.0081(10) 
C25 0.0223(11) 0.0422(14) 0.0227(11) -0.0007(10) 0.0016(9) 0.0066(10) 
C26 0.0305(13) 0.0360(14) 0.0392(15) -0.0038(11) -0.0053(11) 0.0061(11) 
C27 0.0351(14) 0.0429(16) 0.0353(14) -0.0048(12) 0.0040(11) 0.0025(12) 
O2 0.0403(11) 0.0452(12) 0.0517(13) -0.0073(9) -0.0033(10) 0.0008(9) 
C31 0.0369(14) 0.0307(13) 0.0286(12) 0.0074(10) 0.0089(10) -0.0007(11) 
C32 0.0274(12) 0.0207(11) 0.0298(12) 0.0052(9) 0.0100(9) 0.0022(9) 
C33 0.0219(11) 0.0215(11) 0.0231(11) -0.0022(8) 0.0068(8) 0.0032(8) 
C34 0.0221(11) 0.0187(10) 0.0273(11) -0.0034(8) 0.0040(9) -0.0016(8) 
C35 0.0161(10) 0.0311(12) 0.0334(13) 0.0046(10) 0.0029(9) 0.0023(9) 
C36 0.0165(10) 0.0297(12) 0.0315(12) -0.0010(9) 0.0062(9) 0.0003(9) 
C37 0.0197(11) 0.0246(12) 0.0385(14) -0.0013(10) 0.0041(10) -0.0012(9) 
O3 0.0249(9) 0.0257(9) 0.0436(11) -0.0057(7) 0.0094(8) -0.0048(7) 
C41 0.0255(12) 0.0194(11) 0.0350(13) -0.0043(9) 0.0030(10) -0.0008(9) 
C42 0.0354(13) 0.0259(12) 0.0256(12) -0.0064(9) 0.0049(10) 0.0025(10) 
C43 0.0176(10) 0.0272(12) 0.0290(12) -0.0047(9) -0.0001(9) -0.0010(9) 
C44 0.0168(10) 0.0283(12) 0.0320(12) -0.0019(9) 0.0014(9) 0.0036(9) 
C45 0.0281(12) 0.0310(12) 0.0250(12) 0.0046(9) 0.0054(9) 0.0046(10) 
C46 0.0318(14) 0.0511(17) 0.0318(14) 0.0137(12) 0.0064(11) -0.0002(12) 
C47 0.0480(17) 0.0509(17) 0.0375(15) -0.0001(13) 0.0197(13) -0.0094(14) 
O4 0.0490(13) 0.0683(15) 0.0456(13) 0.0151(11) 0.0157(10) 0.0046(11) 
 
_geom_special_details 
; 
 All esds (except the esd in the dihedral angle between two l.s. planes) 
 are estimated using the full covariance matrix.  The cell esds are taken 
 into account individually in the estimation of esds in distances, angles 
 and torsion angles; correlations between esds in cell parameters are only 
 used when they are defined by crystal symmetry.  An approximate (isotropic) 
 treatment of cell esds is used for estimating esds involving l.s. planes. 
; 
 
loop_ 
 _geom_bond_atom_site_label_1 
 _geom_bond_atom_site_label_2 
 _geom_bond_distance 
 _geom_bond_site_symmetry_2 
 _geom_bond_publ_flag 
Zn1 N1 2.1260(17) . ? 
Zn1 S2 2.2753(7) . ? 
Zn1 S1 2.3366(6) . ? 
Zn1 S7 2.3514(6) . ? 
Zn2 N2 2.1541(19) . ? 
Zn2 S4 2.2662(6) . ? 
Zn2 S3 2.3275(6) . ? 
Zn2 S1 2.3602(6) . ? 
Zn3 N3 2.1385(18) . ? 
Zn3 S6 2.2801(7) . ? 
Zn3 S3 2.3543(6) . ? 
Zn3 S5 2.3557(6) . ? 
Zn4 N4 2.1567(18) . ? 
Zn4 S8 2.2803(6) . ? 
Zn4 S7 2.3377(6) . ? 
Zn4 S5 2.3584(6) . ? 
S1 C24 1.842(3) . ? 
S2 C11 1.827(2) . ? 
S3 C34 1.841(2) . ? 
S4 C21 1.819(3) . ? 
S5 C44 1.850(2) . ? 
S6 C31 1.824(3) . ? 
S7 C14 1.846(2) . ? 
S8 C41 1.826(2) . ? 
N1 C13 1.486(3) . ? 
N1 C12 1.488(3) . ? 
N1 C15 1.492(3) . ? 
N2 C23 1.484(3) . ? 
N2 C22 1.493(3) . ? 
N2 C25 1.494(3) . ? 
N3 C33 1.484(3) . ? 
N3 C35 1.491(3) . ? 
N3 C32 1.493(3) . ? 
N4 C42 1.485(3) . ? 
N4 C43 1.494(3) . ? 
N4 C45 1.495(3) . ? 
C11 C12 1.517(3) . ? 
C13 C14 1.520(3) . ? 
C15 C16 1.522(3) . ? 
C16 C17 1.521(3) . ? 
C17 O1 1.426(3) . ? 
C21 C22 1.528(4) . ? 
C23 C24 1.523(3) . ? 
C25 C26 1.532(4) . ? 
C26 C27 1.511(4) . ? 
C27 O2 1.412(3) . ? 
C31 C32 1.522(3) . ? 
C33 C34 1.523(3) . ? 
C35 C36 1.517(3) . ? 
C36 C37 1.521(3) . ? 
C37 O3 1.432(3) . ? 
C41 C42 1.527(3) . ? 
C43 C44 1.521(3) . ? 
C45 C46 1.523(4) . ? 
C46 C47 1.508(4) . ? 
C47 O4 1.393(4) . ? 
 
loop_ 
 _geom_angle_atom_site_label_1 
 _geom_angle_atom_site_label_2 
 _geom_angle_atom_site_label_3 
 _geom_angle 
 _geom_angle_site_symmetry_1 
 _geom_angle_site_symmetry_3 
 _geom_angle_publ_flag 
N1 Zn1 S2 90.89(5) . . ? 
N1 Zn1 S1 119.99(5) . . ? 
S2 Zn1 S1 114.78(2) . . ? 
N1 Zn1 S7 89.69(5) . . ? 
S2 Zn1 S7 126.20(2) . . ? 
S1 Zn1 S7 111.01(2) . . ? 
N2 Zn2 S4 91.17(5) . . ? 
N2 Zn2 S3 123.55(6) . . ? 
S4 Zn2 S3 118.29(2) . . ? 
N2 Zn2 S1 89.52(5) . . ? 
S4 Zn2 S1 125.86(2) . . ? 
S3 Zn2 S1 105.63(2) . . ? 
N3 Zn3 S6 91.49(5) . . ? 
N3 Zn3 S3 88.76(5) . . ? 
S6 Zn3 S3 126.25(3) . . ? 
N3 Zn3 S5 123.33(5) . . ? 
S6 Zn3 S5 115.62(2) . . ? 
S3 Zn3 S5 108.48(2) . . ? 
N4 Zn4 S8 90.22(5) . . ? 
N4 Zn4 S7 123.21(5) . . ? 
S8 Zn4 S7 114.97(2) . . ? 
N4 Zn4 S5 89.67(5) . . ? 
S8 Zn4 S5 127.08(2) . . ? 
S7 Zn4 S5 108.83(2) . . ? 
C24 S1 Zn1 101.37(8) . . ? 
C24 S1 Zn2 94.76(8) . . ? 
Zn1 S1 Zn2 102.89(2) . . ? 
C11 S2 Zn1 95.90(7) . . ? 
C34 S3 Zn2 102.47(8) . . ? 
C34 S3 Zn3 95.05(7) . . ? 
Zn2 S3 Zn3 106.48(2) . . ? 
C21 S4 Zn2 95.88(8) . . ? 
C44 S5 Zn3 102.36(8) . . ? 
C44 S5 Zn4 94.80(7) . . ? 
Zn3 S5 Zn4 104.27(2) . . ? 
C31 S6 Zn3 94.94(8) . . ? 
C14 S7 Zn4 103.05(8) . . ? 
C14 S7 Zn1 94.73(7) . . ? 
Zn4 S7 Zn1 104.72(2) . . ? 
C41 S8 Zn4 96.13(8) . . ? 
C13 N1 C12 109.86(16) . . ? 
C13 N1 C15 111.39(17) . . ? 
C12 N1 C15 109.12(16) . . ? 
C13 N1 Zn1 109.18(12) . . ? 
C12 N1 Zn1 103.55(12) . . ? 
C15 N1 Zn1 113.44(13) . . ? 
C23 N2 C22 110.0(2) . . ? 
C23 N2 C25 109.89(19) . . ? 
C22 N2 C25 109.06(19) . . ? 
C23 N2 Zn2 103.19(14) . . ? 
C22 N2 Zn2 105.71(14) . . ? 
C25 N2 Zn2 118.65(14) . . ? 
C33 N3 C35 111.11(17) . . ? 
C33 N3 C32 109.35(17) . . ? 
C35 N3 C32 109.25(17) . . ? 
C33 N3 Zn3 110.20(13) . . ? 
C35 N3 Zn3 112.67(14) . . ? 
C32 N3 Zn3 104.00(13) . . ? 
C42 N4 C43 109.85(18) . . ? 
C42 N4 C45 110.38(18) . . ? 
C43 N4 C45 109.78(17) . . ? 
C42 N4 Zn4 106.70(13) . . ? 
C43 N4 Zn4 103.42(13) . . ? 
C45 N4 Zn4 116.39(14) . . ? 
C12 C11 S2 112.48(15) . . ? 
N1 C12 C11 113.81(18) . . ? 
N1 C13 C14 113.47(18) . . ? 
C13 C14 S7 114.14(15) . . ? 
N1 C15 C16 114.35(18) . . ? 
C17 C16 C15 111.39(19) . . ? 
O1 C17 C16 112.23(19) . . ? 
C22 C21 S4 113.08(18) . . ? 
N2 C22 C21 113.5(2) . . ? 
N2 C23 C24 113.68(19) . . ? 
C23 C24 S1 112.15(17) . . ? 
N2 C25 C26 113.97(19) . . ? 
C27 C26 C25 113.9(2) . . ? 
O2 C27 C26 116.0(2) . . ? 
C32 C31 S6 113.43(17) . . ? 
N3 C32 C31 112.97(19) . . ? 
N3 C33 C34 112.90(17) . . ? 
C33 C34 S3 113.33(15) . . ? 
N3 C35 C36 113.82(18) . . ? 
C35 C36 C37 110.3(2) . . ? 
O3 C37 C36 112.2(2) . . ? 
C42 C41 S8 112.05(16) . . ? 
N4 C42 C41 113.56(19) . . ? 
N4 C43 C44 113.52(18) . . ? 
C43 C44 S5 112.25(16) . . ? 
N4 C45 C46 114.41(19) . . ? 
C47 C46 C45 113.3(2) . . ? 
O4 C47 C46 113.7(3) . . ? 
 
loop_ 
 _geom_torsion_atom_site_label_1 
 _geom_torsion_atom_site_label_2 
 _geom_torsion_atom_site_label_3 
 _geom_torsion_atom_site_label_4 
 _geom_torsion 
 _geom_torsion_site_symmetry_1 
 _geom_torsion_site_symmetry_2 
 _geom_torsion_site_symmetry_3 
 _geom_torsion_site_symmetry_4 
 _geom_torsion_publ_flag 
N1 Zn1 S1 C24 -75.65(10) . . . . ? 
S2 Zn1 S1 C24 30.99(8) . . . . ? 
S7 Zn1 S1 C24 -178.06(8) . . . . ? 
N1 Zn1 S1 Zn2 -173.28(6) . . . . ? 
S2 Zn1 S1 Zn2 -66.65(3) . . . . ? 
S7 Zn1 S1 Zn2 84.30(3) . . . . ? 
N2 Zn2 S1 C24 -2.86(10) . . . . ? 
S4 Zn2 S1 C24 88.23(9) . . . . ? 
S3 Zn2 S1 C24 -127.72(8) . . . . ? 
N2 Zn2 S1 Zn1 99.97(6) . . . . ? 
S4 Zn2 S1 Zn1 -168.94(2) . . . . ? 
S3 Zn2 S1 Zn1 -24.89(3) . . . . ? 
N1 Zn1 S2 C11 -3.06(9) . . . . ? 
S1 Zn1 S2 C11 -126.96(8) . . . . ? 
S7 Zn1 S2 C11 87.21(8) . . . . ? 
N2 Zn2 S3 C34 78.55(10) . . . . ? 
S4 Zn2 S3 C34 -34.07(8) . . . . ? 
S1 Zn2 S3 C34 178.64(7) . . . . ? 
N2 Zn2 S3 Zn3 177.73(6) . . . . ? 
S4 Zn2 S3 Zn3 65.10(3) . . . . ? 
S1 Zn2 S3 Zn3 -82.19(3) . . . . ? 
N3 Zn3 S3 C34 8.38(9) . . . . ? 
S6 Zn3 S3 C34 -82.57(8) . . . . ? 
S5 Zn3 S3 C34 133.29(7) . . . . ? 
N3 Zn3 S3 Zn2 -96.23(5) . . . . ? 
S6 Zn3 S3 Zn2 172.82(3) . . . . ? 
S5 Zn3 S3 Zn2 28.68(3) . . . . ? 
N2 Zn2 S4 C21 5.39(12) . . . . ? 
S3 Zn2 S4 C21 135.08(10) . . . . ? 
S1 Zn2 S4 C21 -84.87(10) . . . . ? 
N3 Zn3 S5 C44 -81.45(10) . . . . ? 
S6 Zn3 S5 C44 29.04(8) . . . . ? 
S3 Zn3 S5 C44 177.44(8) . . . . ? 
N3 Zn3 S5 Zn4 -179.74(6) . . . . ? 
S6 Zn3 S5 Zn4 -69.25(3) . . . . ? 
S3 Zn3 S5 Zn4 79.16(3) . . . . ? 
N4 Zn4 S5 C44 -2.50(9) . . . . ? 
S8 Zn4 S5 C44 87.53(8) . . . . ? 
S7 Zn4 S5 C44 -127.72(8) . . . . ? 
N4 Zn4 S5 Zn3 101.56(5) . . . . ? 
S8 Zn4 S5 Zn3 -168.41(2) . . . . ? 
S7 Zn4 S5 Zn3 -23.65(3) . . . . ? 
N3 Zn3 S6 C31 0.54(10) . . . . ? 
S3 Zn3 S6 C31 90.10(9) . . . . ? 
S5 Zn3 S6 C31 -127.94(9) . . . . ? 
N4 Zn4 S7 C14 80.50(9) . . . . ? 
S8 Zn4 S7 C14 -27.55(8) . . . . ? 
S5 Zn4 S7 C14 -177.03(8) . . . . ? 
N4 Zn4 S7 Zn1 179.03(6) . . . . ? 
S8 Zn4 S7 Zn1 70.98(3) . . . . ? 
S5 Zn4 S7 Zn1 -78.50(3) . . . . ? 
N1 Zn1 S7 C14 4.78(9) . . . . ? 
S2 Zn1 S7 C14 -86.10(8) . . . . ? 
S1 Zn1 S7 C14 127.02(8) . . . . ? 
N1 Zn1 S7 Zn4 -100.05(5) . . . . ? 
S2 Zn1 S7 Zn4 169.07(2) . . . . ? 
S1 Zn1 S7 Zn4 22.18(3) . . . . ? 
N4 Zn4 S8 C41 7.28(10) . . . . ? 
S7 Zn4 S8 C41 134.57(8) . . . . ? 
S5 Zn4 S8 C41 -82.48(9) . . . . ? 
S2 Zn1 N1 C13 144.99(13) . . . . ? 
S1 Zn1 N1 C13 -95.47(13) . . . . ? 
S7 Zn1 N1 C13 18.79(13) . . . . ? 
S2 Zn1 N1 C12 28.00(12) . . . . ? 
S1 Zn1 N1 C12 147.54(11) . . . . ? 
S7 Zn1 N1 C12 -98.20(12) . . . . ? 
S2 Zn1 N1 C15 -90.14(13) . . . . ? 
S1 Zn1 N1 C15 29.40(15) . . . . ? 
S7 Zn1 N1 C15 143.66(13) . . . . ? 
S4 Zn2 N2 C23 -96.54(13) . . . . ? 
S3 Zn2 N2 C23 137.84(12) . . . . ? 
S1 Zn2 N2 C23 29.32(13) . . . . ? 
S4 Zn2 N2 C22 19.01(16) . . . . ? 
S3 Zn2 N2 C22 -106.61(16) . . . . ? 
S1 Zn2 N2 C22 144.87(16) . . . . ? 
S4 Zn2 N2 C25 141.71(16) . . . . ? 
S3 Zn2 N2 C25 16.09(18) . . . . ? 
S1 Zn2 N2 C25 -92.43(16) . . . . ? 
S6 Zn3 N3 C33 141.94(13) . . . . ? 
S3 Zn3 N3 C33 15.71(13) . . . . ? 
S5 Zn3 N3 C33 -95.72(13) . . . . ? 
S6 Zn3 N3 C35 -93.35(14) . . . . ? 
S3 Zn3 N3 C35 140.42(14) . . . . ? 
S5 Zn3 N3 C35 28.99(16) . . . . ? 
S6 Zn3 N3 C32 24.84(13) . . . . ? 
S3 Zn3 N3 C32 -101.39(13) . . . . ? 
S5 Zn3 N3 C32 147.18(12) . . . . ? 
S8 Zn4 N4 C42 17.57(14) . . . . ? 
S7 Zn4 N4 C42 -102.90(14) . . . . ? 
S5 Zn4 N4 C42 144.65(14) . . . . ? 
S8 Zn4 N4 C43 -98.28(13) . . . . ? 
S7 Zn4 N4 C43 141.25(11) . . . . ? 
S5 Zn4 N4 C43 28.80(13) . . . . ? 
S8 Zn4 N4 C45 141.27(15) . . . . ? 
S7 Zn4 N4 C45 20.80(17) . . . . ? 
S5 Zn4 N4 C45 -91.65(15) . . . . ? 
Zn1 S2 C11 C12 -22.90(16) . . . . ? 
C13 N1 C12 C11 -167.89(18) . . . . ? 
C15 N1 C12 C11 69.7(2) . . . . ? 
Zn1 N1 C12 C11 -51.4(2) . . . . ? 
S2 C11 C12 N1 52.7(2) . . . . ? 
C12 N1 C13 C14 70.1(2) . . . . ? 
C15 N1 C13 C14 -168.90(17) . . . . ? 
Zn1 N1 C13 C14 -42.9(2) . . . . ? 
N1 C13 C14 S7 50.5(2) . . . . ? 
Zn4 S7 C14 C13 77.54(16) . . . . ? 
Zn1 S7 C14 C13 -28.77(16) . . . . ? 
C13 N1 C15 C16 49.4(2) . . . . ? 
C12 N1 C15 C16 170.89(18) . . . . ? 
Zn1 N1 C15 C16 -74.2(2) . . . . ? 
N1 C15 C16 C17 162.05(19) . . . . ? 
C15 C16 C17 O1 167.71(19) . . . . ? 
Zn2 S4 C21 C22 -30.3(2) . . . . ? 
C23 N2 C22 C21 66.9(3) . . . . ? 
C25 N2 C22 C21 -172.5(2) . . . . ? 
Zn2 N2 C22 C21 -43.9(3) . . . . ? 
S4 C21 C22 N2 53.1(3) . . . . ? 
C22 N2 C23 C24 -167.4(2) . . . . ? 
C25 N2 C23 C24 72.5(3) . . . . ? 
Zn2 N2 C23 C24 -55.0(2) . . . . ? 
N2 C23 C24 S1 56.7(3) . . . . ? 
Zn1 S1 C24 C23 -128.57(17) . . . . ? 
Zn2 S1 C24 C23 -24.39(18) . . . . ? 
C23 N2 C25 C26 -162.8(2) . . . . ? 
C22 N2 C25 C26 76.5(3) . . . . ? 
Zn2 N2 C25 C26 -44.5(3) . . . . ? 
N2 C25 C26 C27 -170.7(2) . . . . ? 
C25 C26 C27 O2 -59.9(3) . . . . ? 
Zn3 S6 C31 C32 -26.93(18) . . . . ? 
C33 N3 C32 C31 -166.79(19) . . . . ? 
C35 N3 C32 C31 71.4(2) . . . . ? 
Zn3 N3 C32 C31 -49.1(2) . . . . ? 
S6 C31 C32 N3 54.5(2) . . . . ? 
C35 N3 C33 C34 -167.02(18) . . . . ? 
C32 N3 C33 C34 72.3(2) . . . . ? 
Zn3 N3 C33 C34 -41.4(2) . . . . ? 
N3 C33 C34 S3 52.2(2) . . . . ? 
Zn2 S3 C34 C33 75.45(16) . . . . ? 
Zn3 S3 C34 C33 -32.69(16) . . . . ? 
C33 N3 C35 C36 56.4(3) . . . . ? 
C32 N3 C35 C36 177.15(19) . . . . ? 
Zn3 N3 C35 C36 -67.8(2) . . . . ? 
N3 C35 C36 C37 155.9(2) . . . . ? 
C35 C36 C37 O3 174.97(19) . . . . ? 
Zn4 S8 C41 C42 -32.20(17) . . . . ? 
C43 N4 C42 C41 67.7(2) . . . . ? 
C45 N4 C42 C41 -171.15(19) . . . . ? 
Zn4 N4 C42 C41 -43.8(2) . . . . ? 
S8 C41 C42 N4 54.1(2) . . . . ? 
C42 N4 C43 C44 -168.06(19) . . . . ? 
C45 N4 C43 C44 70.4(2) . . . . ? 
Zn4 N4 C43 C44 -54.5(2) . . . . ? 
N4 C43 C44 S5 56.4(2) . . . . ? 
Zn3 S5 C44 C43 -130.55(16) . . . . ? 
Zn4 S5 C44 C43 -24.80(17) . . . . ? 
C42 N4 C45 C46 63.3(3) . . . . ? 
C43 N4 C45 C46 -175.4(2) . . . . ? 
Zn4 N4 C45 C46 -58.5(2) . . . . ? 
N4 C45 C46 C47 162.5(2) . . . . ? 
C45 C46 C47 O4 61.5(3) . . . . ? 
 
_diffrn_measured_fraction_theta_max    0.990 
_diffrn_reflns_theta_full              28.28 
_diffrn_measured_fraction_theta_full   0.990 
_refine_diff_density_max    1.124 
_refine_diff_density_min   -0.495 
_refine_diff_density_rms    0.078 
